# Supplementary material for: Association between Vegetable Consumption and Blood Pressure, Stratified by BMI, among Chinese Adolescents Aged 13–17 Years: A National Cross-Sectional Study
Source: MDPI journal article supplement (doi:10.3390/nu10040451), 2018-04-05
Supplement: s1 [file s1]

## Supplementary Material

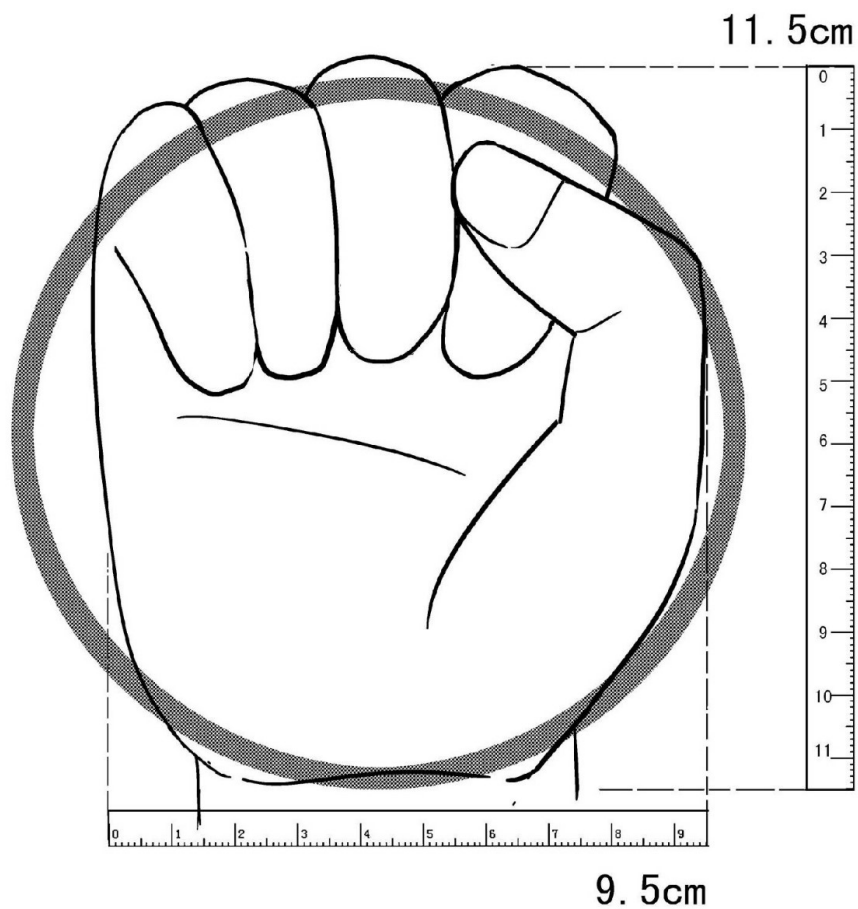

**Figure S1.** The size of one serving of fruit or vegetable (as the size of a fist of ordinary adult).

**Table S1.** Body mass index reference for screening overweight and obesity in Chinese school-age children (kg/m<sup>2</sup>).

| Age (years) | Boys       |         | Girls      |         |
|-------------|------------|---------|------------|---------|
|             | overweight | obesity | overweight | obesity |
| 13~         | 21.9       | 25.7    | 22.6       | 25.6    |
| 14~         | 22.6       | 26.4    | 23.0       | 26.3    |
| 15~         | 23.1       | 26.9    | 23.4       | 26.9    |
| 16~         | 23.5       | 27.4    | 23.7       | 27.4    |
| 17~         | 23.8       | 27.8    | 23.8       | 27.7    |

**Ref:** Ji CY, Working Group on Obesity in C (2005) Report on childhood obesity in China (1)--body mass index reference for screening overweight and obesity in Chinese school-age children. *Biomedical and environmental sciences: BES* 2005, 18, 390–400.
